# Supplementary material for: Hepatic Transcriptome Responses of Domesticated and Wild Turkey Embryos to Aflatoxin B1
Source: MDPI journal article supplement (doi:10.3390/toxins8010016), 2016-01-06
Supplement: s1 [file s1]

# Supplementary Materials: Hepatic Transcriptome Responses of Domesticated and Wild Turkey Embryos to Aflatoxin B<sub>1</sub>

Melissa S. Monson, Carol J. Cardona, Roger A. Coulombe and Kent M. Reed

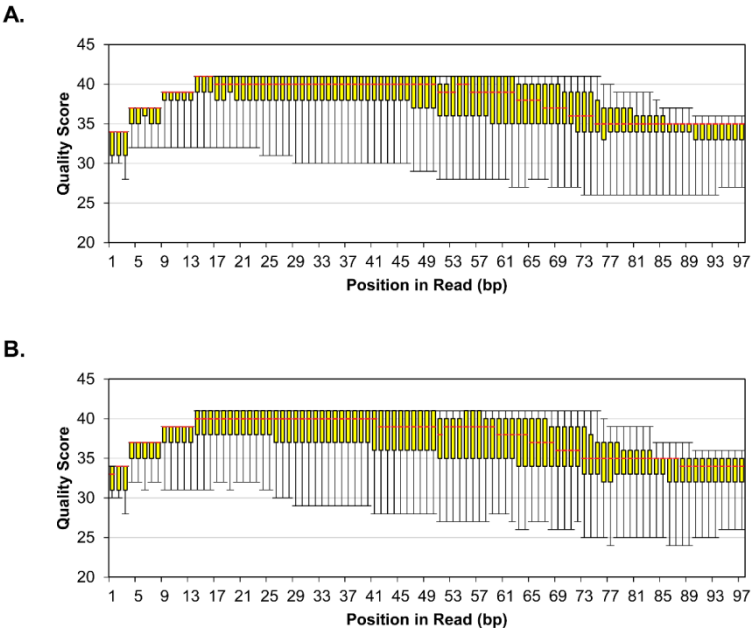

**Figure S1.** Quality scores at each base position for corrected liver RNA-seq datasets. **(A)** Domesticated turkey (DT); **(B)** Wild turkey (WT). Boxplots were based on quality score distributions generated in CLGWB. The median at each position is shown in red.

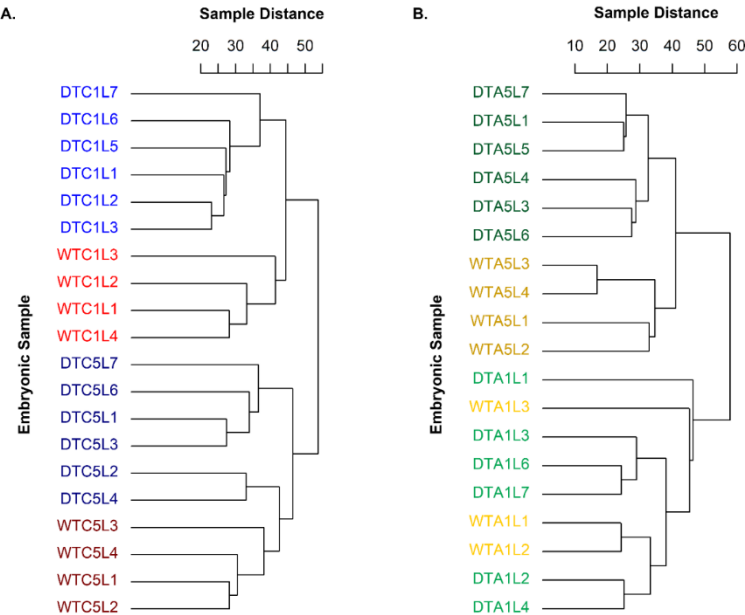

**Figure S2.** Hierarchical clustering of CNTL or AFB samples follows exposure time and turkey time. **(A)** Sample distances in CNTL; **(B)** Sample distances in AFB. Dendrogram was generated in R using regularized log<sub>2</sub> transformed read counts from DESeq2 [30]. Domesticated turkey (DT, green), wild turkey (WT, yellow), aflatoxin B<sub>1</sub> (AFB), aflatoxin B<sub>1</sub> 1 day (A1, lighter), aflatoxin B<sub>1</sub> 5 days (A5, darker), liver sample (L).

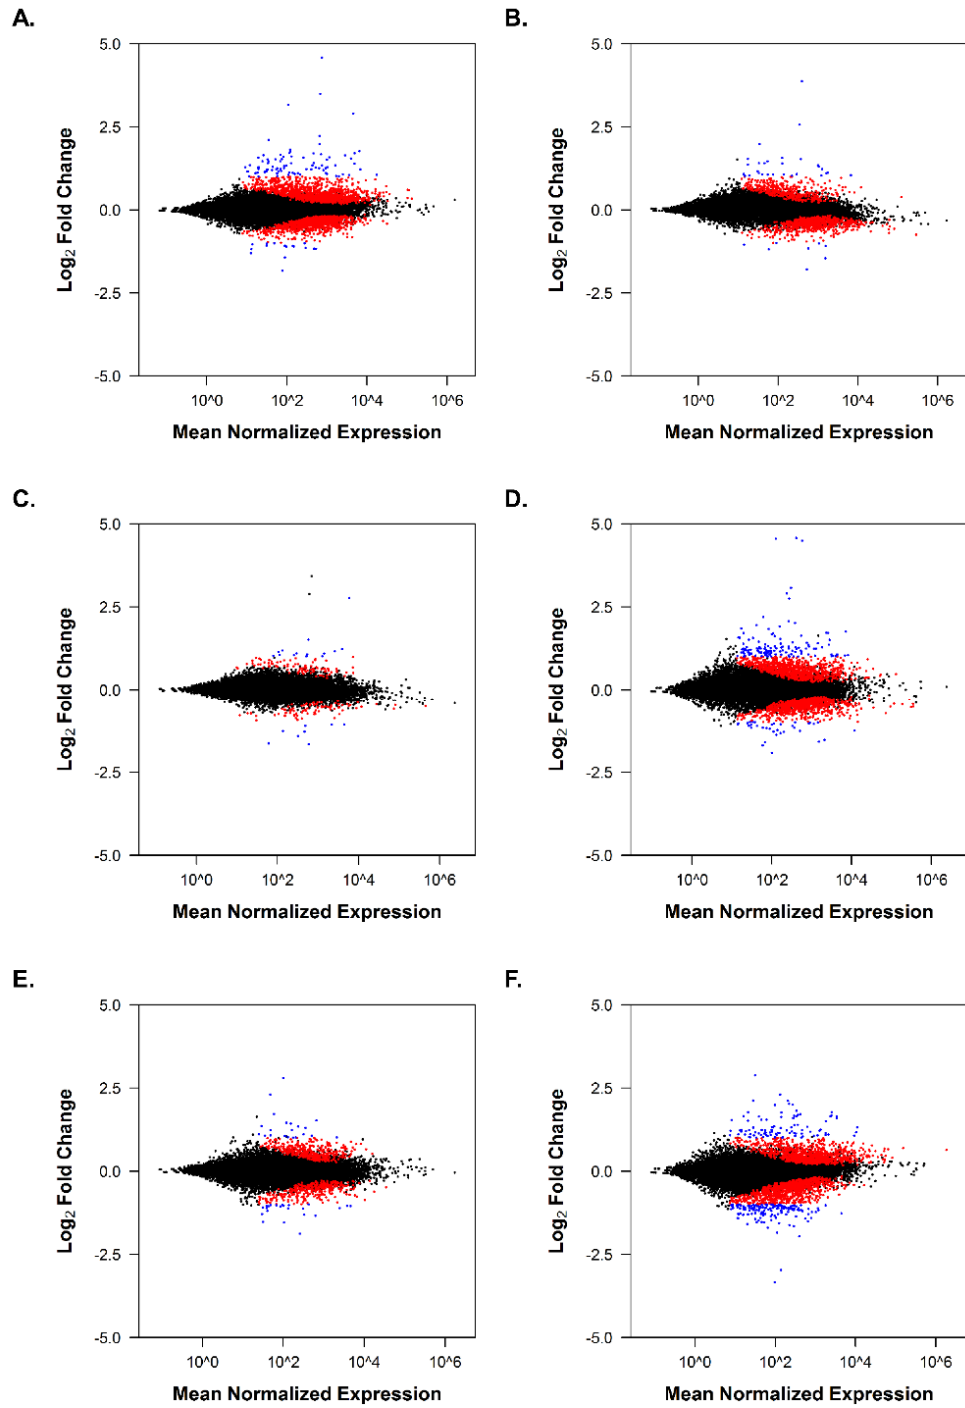

**Figure S3.** Significant DE from AFB exposure in DT and WT. (A) DTA1/DTC1; (B) DTA5/DTC5; (C) WTA1/WTC1; (D) WTA5/WTC5; (E) WTA1/DTA1; (F) WTA5/DTA5. MA plots were created in R using log<sub>2</sub> fold change (log<sub>2</sub>FC) and mean normalized read counts from DESeq2 [30]. Genes with significant differential expression (DE) ( $q$ -values  $\leq 0.05$ ) are red; significant genes with  $|\log_2\text{FC}| \geq 1.0$  are blue. Domesticated turkey (DT), wild turkey (WT), control (CNTL), control 1 day (C1), control 5 days (C5), aflatoxin B<sub>1</sub> (AFB), aflatoxin B<sub>1</sub> 1 day (A1), aflatoxin B<sub>1</sub> 5 days (A5).

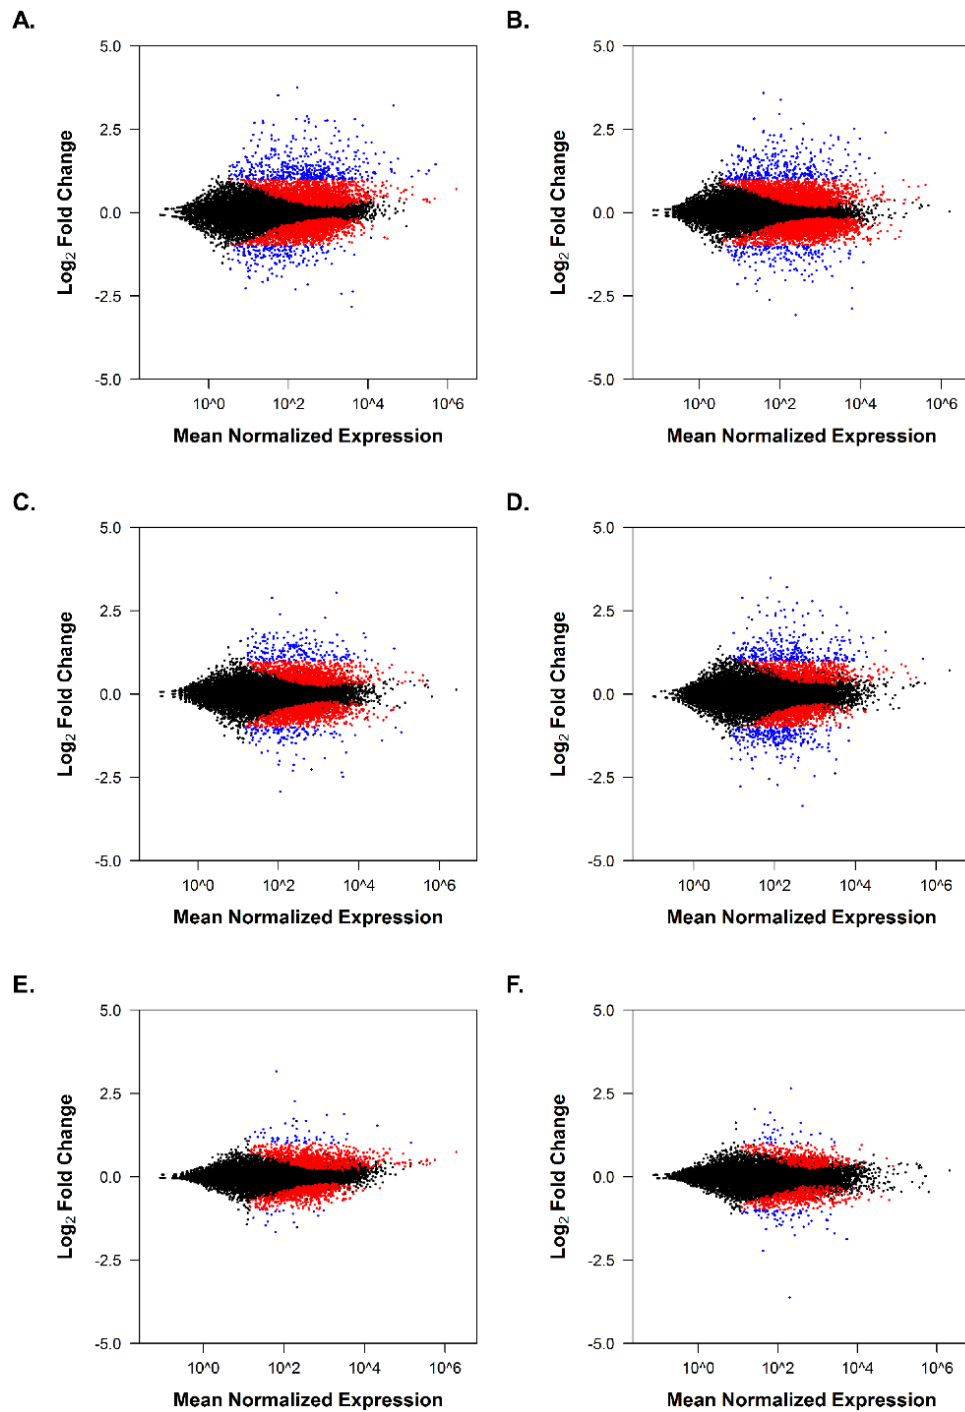

**Figure S4.** Significant DE during development in DT and WT. (A) DTC5/DTC1; (B) DTA5/DTA1; (C) WTC5/WTC1; (D) WTA5/DTA1; (E) WTC1/DTC1; (F) WTC5/DTC5. MA plots were created in R using log<sub>2</sub> fold change (log<sub>2</sub>FC) and mean normalized read counts from DESeq2 [30]. Genes with significant differential expression (DE) ( $q$ -values  $\leq 0.05$ ) are red; significant genes with  $|\log_2FC| \geq 1.0$  are blue. Domesticated turkey (DT), wild turkey (WT), control (CNTL), control 1 day (C1), control 5 days (C5), aflatoxin B<sub>1</sub> (AFB), aflatoxin B<sub>1</sub> 1 day (A1), aflatoxin B<sub>1</sub> 5 days (A5).

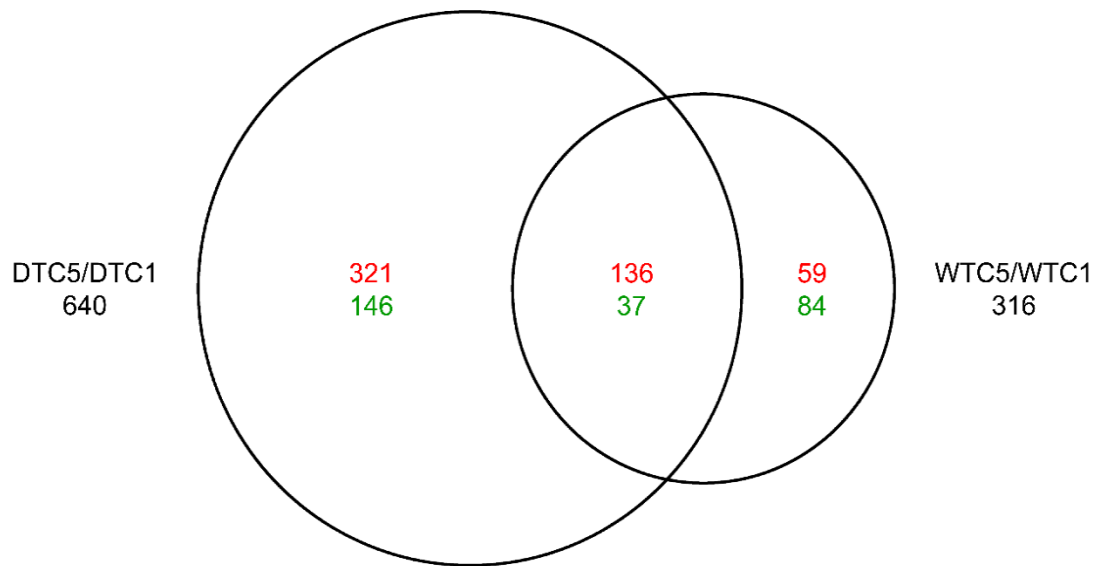

**Figure S5.** Overlap between significant DE in DT and WT during development. The number of shared and unique genes with significant differential expression (DE) ( $q$ -value  $\leq 0.05$ ) and  $|\log_2FC| \geq 1.0$  is indicated for C5 versus C1. Direction of DE is shown (red = up-regulated, green = down-regulated). Domesticated turkey (DT), wild turkey (WT), control 1 day (C1), control 5 days (C5),  $\log_2$  fold change ( $\log_2FC$ ).

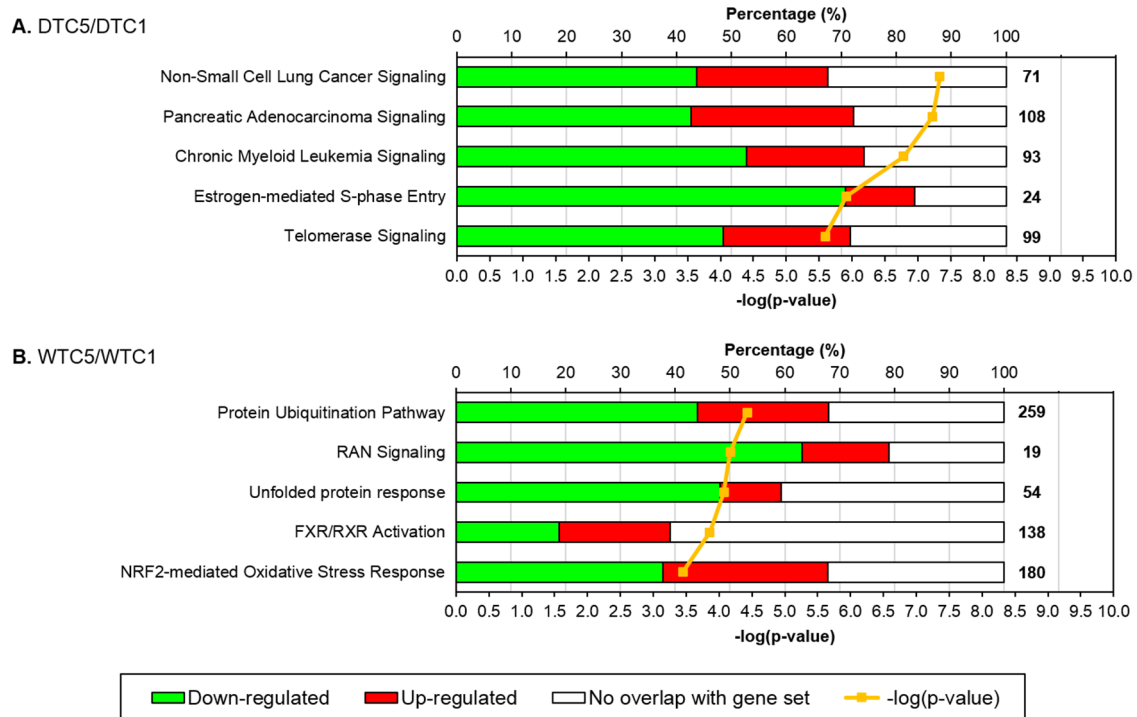

**Figure S6.** Expression across highly significant pathways in CNTL groups during development. (A) DTC5/DTC1; (B) WTC5/WTC1. Ingenuity Pathway Analysis (IPA) was used to identify significant effects on canonical pathways ( $-\log(p\text{-value}) > 1.3$ ). Percentage of genes down-regulated (green), up-regulated (red), not represented in MAKER gene set (white) are shown for the 5 most significant pathways ( $-\log(p\text{-values})$  in yellow) in each comparison; both significant and non-significant DE are included. Total number of genes in each pathway are in bold. Domesticated turkey (DT), wild turkey (WT), control (CNTL), control 1 day (C1), control 5 days (C5).

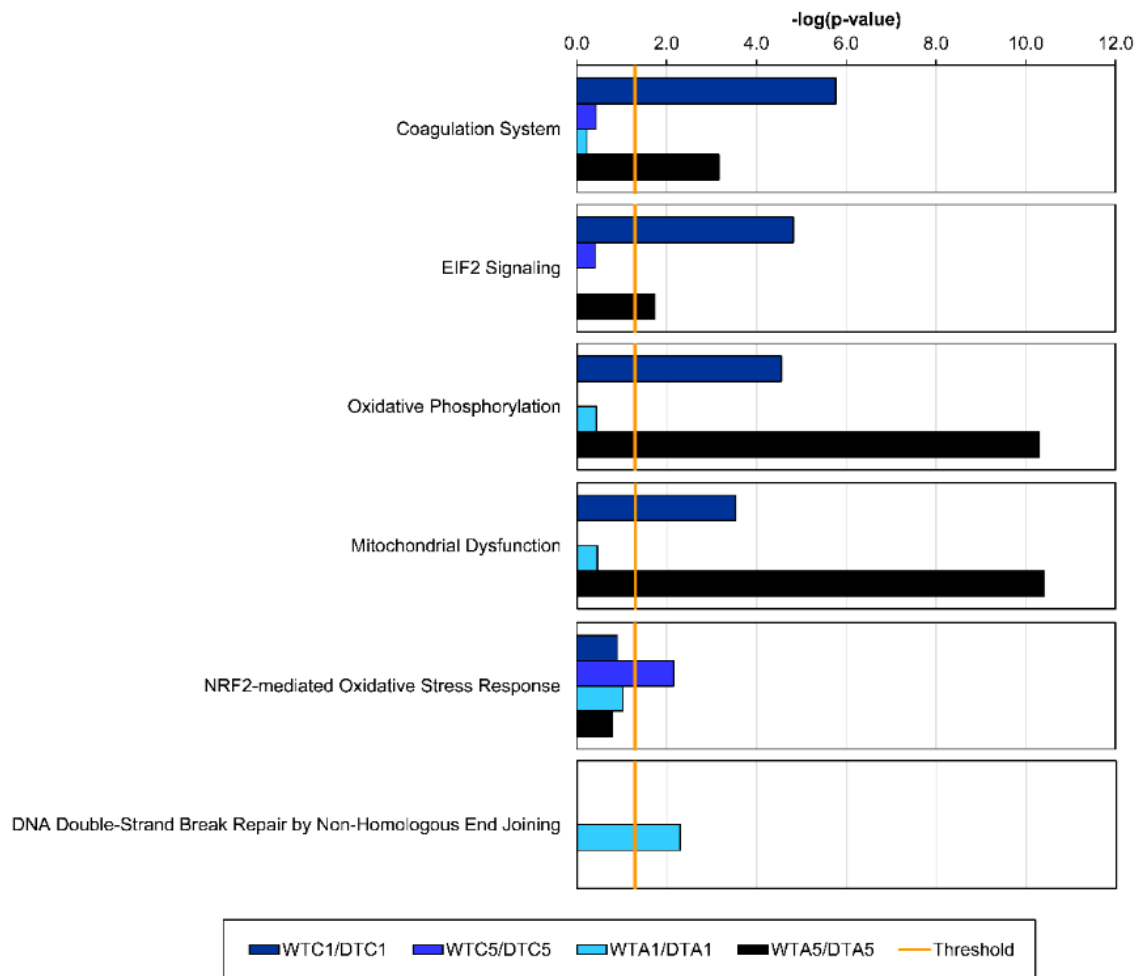

**Figure S7.** Significance of pathway associations vary in WT versus DT comparisons. Ingenuity Pathway Analysis (IPA) assigned *p*-values to canonical pathways based on differential expression (DE). Bar plot provides 6 example pathways with variable significance between the WTC1/DTC1 (dark blue), WTC5/DTC5 (bright blue), WTA1/DTA1 (light blue), and WTA5/DTA5 (black) comparisons. Pathway associations must have a  $-\log(p\text{-value}) > 1.3$  (threshold line, yellow) to be considered significant. Domesticated turkey (DT), wild turkey (WT), control 1 day (C1), control 5 days (C5), aflatoxin B<sub>1</sub> 1 day (A1), aflatoxin B<sub>1</sub> 5 days (A5).

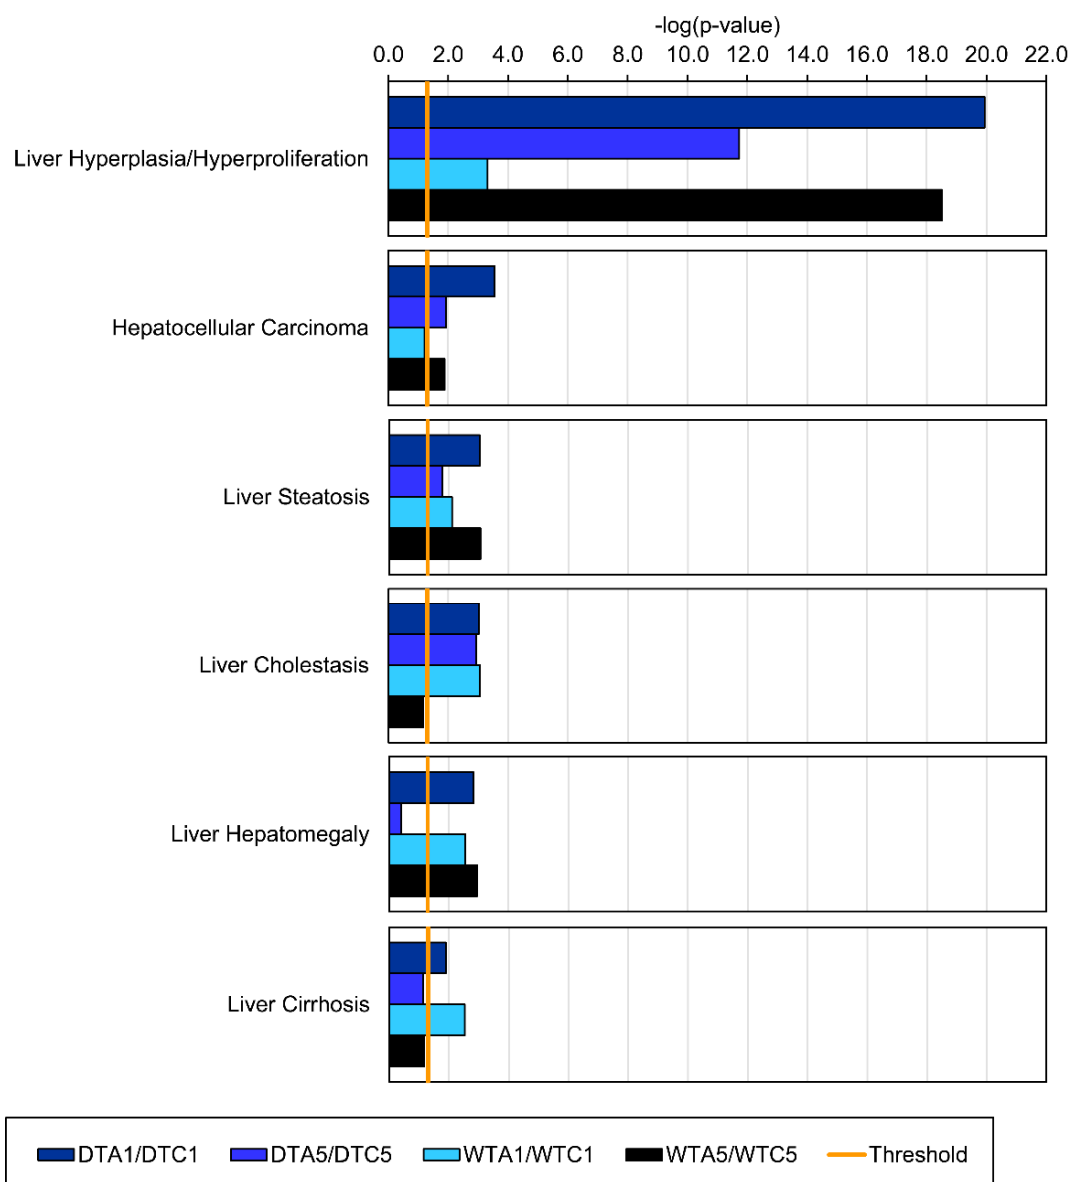

**Figure S8.** Significance of hepatotoxicity associations in AFB versus CNTL comparisons. Ingenuity Pathway Analysis (IPA) assigned  $p$ -values to toxicological functions based on differential expression (DE). Bar plot provides the 6 most significant hepatotoxic outcomes across the DTA1/DTC1 (dark blue), DTA5/DTC5 (bright blue), WTA1/WTC1 (light blue), and WTA5/WTC5 (black) comparisons. Functional associations must have a  $-\log(p\text{-value}) > 1.3$  (threshold line, yellow) to be considered significant. Domesticated turkey (DT), wild turkey (WT), control (CNTL), control 1 day (C1), control 5 days (C5), aflatoxin B<sub>1</sub> (AFB), aflatoxin B<sub>1</sub> 1 day (A1), aflatoxin B<sub>1</sub> 5 days (A5).

**Table S1.** Post hoc comparisons of mean egg, embryo and liver weights.

| Group                         | Mean  | St Dev | Group | Mean  | St Dev | <i>p</i> -Value |
|-------------------------------|-------|--------|-------|-------|--------|-----------------|
| <i>Egg Weights</i>            |       |        |       |       |        |                 |
| DTA1                          | 81.13 | ±8.49  | DTC1  | 79.56 | ±5.62  | 1.00            |
| DTA5                          | 82.16 | ±5.56  | DTC5  | 76.60 | ±5.71  | 0.68            |
| DTC5                          | 76.60 | ±5.71  | DTC1  | 79.56 | ±5.62  | 0.98            |
| DTA5                          | 82.16 | ±5.56  | DTA1  | 81.13 | ±8.49  | 1.00            |
| WTA1                          | 74.70 | ±4.51  | WTC1  | 66.77 | ±8.75  | 0.69            |
| WTA5                          | 60.18 | ±3.68  | WTC5  | 66.30 | ±10.52 | 0.84            |
| WTC5                          | 66.30 | ±10.52 | WTC1  | 66.77 | ±8.75  | 1.00            |
| WTA5                          | 60.18 | ±3.68  | WTA1  | 74.70 | ±4.51  | 0.081           |
| WTA1                          | 74.70 | ±4.51  | DTA1  | 81.13 | ±8.49  | 0.78            |
| WTA5                          | 60.18 | ±3.68  | DTA5  | 82.16 | ±5.56  | <0.001          |
| WTC1                          | 66.77 | ±8.75  | DTC1  | 79.56 | ±5.62  | 0.051           |
| WTC5                          | 66.30 | ±10.52 | DTC5  | 76.60 | ±5.71  | 0.18            |
| <i>Embryo Weights</i>         |       |        |       |       |        |                 |
| DTA1                          | 17.67 | ±0.49  | DTC1  | 16.58 | ±0.97  | 0.94            |
| DTA5                          | 32.60 | ±2.86  | DTC5  | 30.70 | ±1.93  | 0.53            |
| DTC5                          | 30.70 | ±1.93  | DTC1  | 16.58 | ±0.97  | < 0.001         |
| DTA5                          | 32.60 | ±2.86  | DTA1  | 17.67 | ±0.49  | < 0.001         |
| WTA1                          | 19.08 | ±1.17  | WTC1  | 18.71 | ±1.09  | 1.00            |
| WTA5                          | 24.83 | ±0.46  | WTC5  | 29.59 | ±4.46  | 0.023           |
| WTC5                          | 29.59 | ±4.46  | WTC1  | 18.71 | ±1.09  | < 0.001         |
| WTA5                          | 24.83 | ±0.46  | WTA1  | 19.08 | ±1.17  | 0.0078          |
| WTA1                          | 19.08 | ±1.17  | DTA1  | 17.67 | ±0.49  | 0.94            |
| WTA5                          | 24.83 | ±0.46  | DTA5  | 32.60 | ±2.86  | < 0.001         |
| WTC1                          | 18.71 | ±1.09  | DTC1  | 16.58 | ±0.97  | 0.58            |
| WTC5                          | 29.59 | ±4.46  | DTC5  | 30.70 | ±1.93  | 0.97            |
| <i>Liver Weights</i>          |       |        |       |       |        |                 |
| DTA1                          | 0.28  | ±0.03  | DTC1  | 0.26  | ±0.03  | 1.00            |
| DTA5                          | 0.53  | ±0.22  | DTC5  | 0.65  | ±0.13  | 0.047           |
| DTC5                          | 0.65  | ±0.13  | DTC1  | 0.26  | ±0.03  | <0.001          |
| DTA5                          | 0.53  | ±0.22  | DTA1  | 0.28  | ±0.03  | <0.001          |
| WTA1                          | 0.33  | ±0.04  | WTC1  | 0.34  | ±0.04  | 1.00            |
| WTA5                          | 0.46  | ±0.06  | WTC5  | 0.64  | ±0.07  | 0.016           |
| WTC5                          | 0.64  | ±0.07  | WTC1  | 0.34  | ±0.04  | <0.001          |
| WTA5                          | 0.46  | ±0.06  | WTA1  | 0.33  | ±0.04  | 0.20            |
| WTA1                          | 0.33  | ±0.04  | DTA1  | 0.28  | ±0.03  | 0.92            |
| WTA5                          | 0.46  | ±0.06  | DTA5  | 0.53  | ±0.22  | 0.68            |
| WTC1                          | 0.34  | ±0.04  | DTC1  | 0.26  | ±0.03  | 0.54            |
| WTC5                          | 0.64  | ±0.07  | DTC5  | 0.65  | ±0.13  | 1.00            |
| <i>Relative Liver Weights</i> |       |        |       |       |        |                 |
| DTA1                          | 1.56  | ±0.17  | DTC1  | 1.56  | ±0.12  | 1.00            |
| DTA5                          | 1.64  | ±0.22  | DTC5  | 2.12  | ±0.37  | 0.0086          |
| DTC5                          | 2.12  | ±0.37  | DTC1  | 1.56  | ±0.12  | 0.0015          |
| DTA5                          | 1.64  | ±0.22  | DTA1  | 1.56  | ±0.17  | 1.00            |
| WTA1                          | 1.74  | ±0.26  | WTC1  | 1.81  | ±0.20  | 1.00            |
| WTA5                          | 1.87  | ±0.25  | WTC5  | 2.21  | ±0.34  | 0.41            |
| WTC5                          | 2.21  | ±0.34  | WTC1  | 1.81  | ±0.20  | 0.24            |
| WTA5                          | 1.87  | ±0.25  | WTA1  | 1.74  | ±0.26  | 0.99            |
| WTA1                          | 1.74  | ±0.26  | DTA1  | 1.56  | ±0.17  | 0.93            |
| WTA5                          | 1.87  | ±0.25  | DTA5  | 1.64  | ±0.22  | 0.71            |
| WTC1                          | 1.81  | ±0.20  | DTC1  | 1.56  | ±0.12  | 0.61            |
| WTC5                          | 2.21  | ±0.34  | DTC5  | 2.12  | ±0.37  | 1.00            |

Non-significant *p*-values (≥0.05) from multiple comparisons tests are shown in grey. Domesticated turkey (DT), wild turkey (WT), control 1 day (C1), control 5 days (C5), aflatoxin B<sub>1</sub> 1 day (A1), aflatoxin B<sub>1</sub> 5 days (A5).

**Table S3.** Distribution and expression of the MAKER gene set across the turkey genome (UMD 5.0).

| Chromosome   | Size (Mb) | Total Genes | BLAST Annotated Genes | Gene Density <sup>1</sup> | Genes Expressed in |        |        |
|--------------|-----------|-------------|-----------------------|---------------------------|--------------------|--------|--------|
|              |           |             |                       |                           | DT                 | WT     | Both   |
| 1            | 190.7     | 2228        | 2109                  | 41.0%                     | 2155               | 2160   | 2174   |
| 2            | 109.7     | 1395        | 1295                  | 44.0%                     | 1354               | 1352   | 1365   |
| 3            | 93.2      | 879         | 813                   | 43.5%                     | 847                | 841    | 853    |
| 4            | 70.7      | 874         | 813                   | 50.8%                     | 848                | 844    | 854    |
| 5            | 59.0      | 1024        | 939                   | 47.7%                     | 996                | 997    | 1001   |
| 6            | 50.7      | 699         | 630                   | 47.9%                     | 660                | 652    | 662    |
| 7            | 36.3      | 584         | 543                   | 49.6%                     | 565                | 562    | 569    |
| 8            | 34.7      | 569         | 529                   | 48.5%                     | 551                | 548    | 554    |
| 9            | 19.1      | 379         | 348                   | 46.9%                     | 369                | 369    | 371    |
| 10           | 29.2      | 620         | 570                   | 52.3%                     | 609                | 602    | 611    |
| 11           | 23.7      | 524         | 473                   | 50.3%                     | 502                | 501    | 505    |
| 12           | 19.6      | 447         | 415                   | 54.5%                     | 430                | 434    | 436    |
| 13           | 19.1      | 409         | 388                   | 49.1%                     | 403                | 401    | 404    |
| 14           | 19.5      | 358         | 330                   | 47.4%                     | 349                | 347    | 353    |
| 15           | 17.5      | 400         | 366                   | 38.6%                     | 385                | 384    | 390    |
| 16           | 14.9      | 462         | 435                   | 51.4%                     | 449                | 449    | 453    |
| 17           | 13.1      | 394         | 372                   | 53.8%                     | 386                | 385    | 388    |
| 18           | 0.3       | 32          | 31                    | 82.7%                     | 31                 | 30     | 31     |
| 19           | 10.3      | 315         | 288                   | 55.3%                     | 299                | 299    | 300    |
| 20           | 10.7      | 325         | 309                   | 48.8%                     | 313                | 315    | 316    |
| 21           | 9.7       | 359         | 342                   | 57.1%                     | 346                | 346    | 350    |
| 22           | 13.7      | 390         | 362                   | 43.3%                     | 376                | 378    | 381    |
| 23           | 6.7       | 291         | 274                   | 52.7%                     | 276                | 276    | 281    |
| 24           | 4.1       | 119         | 112                   | 58.0%                     | 117                | 117    | 118    |
| 25           | 5.6       | 230         | 221                   | 44.0%                     | 225                | 224    | 225    |
| 26           | 6.4       | 198         | 173                   | 43.0%                     | 192                | 189    | 192    |
| 27           | 1.4       | 106         | 105                   | 58.3%                     | 102                | 104    | 104    |
| 28           | 5.0       | 261         | 249                   | 58.1%                     | 253                | 249    | 255    |
| 29           | 4.3       | 240         | 231                   | 58.4%                     | 231                | 230    | 234    |
| 30           | 4.6       | 287         | 277                   | 57.9%                     | 281                | 279    | 281    |
| W            | 0.3       | 2           | 2                     | 83.6%                     | 2                  | 2      | 2      |
| Z            | 68.5      | 772         | 739                   | 40.1%                     | 753                | 743    | 755    |
| Unassigned   | 177.0     | 2093        | 2034                  | 3.2%                      | 1638               | 1602   | 1672   |
| Total Genome | 1149.2    | 18,265      | 17,117                | 39.4%                     | 17,293             | 17,211 | 17,440 |

Domesticated turkey (DT), wild turkey (WT). <sup>1</sup> Total length of genes (including introns and UTRs) per chromosome/chromosome size.



**Table S6.** Significant DE genes involved in NRF2-mediated responses in AFB versus CNTL groups.

| Gene ID              | Gene                | DTA1/DTC1 |                          | DTA5/DTC5 |                         | WTA1/WTC1 |                         | WTA5/WTC5 |                         |
|----------------------|---------------------|-----------|--------------------------|-----------|-------------------------|-----------|-------------------------|-----------|-------------------------|
|                      |                     | Log2FC    | q-Value                  | Log2FC    | q-Value                 | Log2FC    | q-Value                 | Log2FC    | q-Value                 |
| Upstream Cytoplasmic |                     |           |                          |           |                         |           |                         |           |                         |
| T_ALT_S_009346       | ACTA2               | 0.50      | 1.05 × 10 <sup>-2</sup>  | 0.05      | 9.24 × 10 <sup>-1</sup> | 0.13      | 9.69 × 10 <sup>-1</sup> | 0.22      | 5.13 × 10 <sup>-1</sup> |
| T_ALT_S_010243       | ACT5                | -0.03     | 8.66 × 10 <sup>-1</sup>  | -0.01     | 9.62 × 10 <sup>-1</sup> | 0.04      | 9.92 × 10 <sup>-1</sup> | 0.43      | 5.97 × 10 <sup>-3</sup> |
| T_ALT_S_006365       | X10IF2AK3           | -0.37     | 3.08 × 10 <sup>-3</sup>  | -0.06     | 8.11 × 10 <sup>-1</sup> | -0.22     | 6.14 × 10 <sup>-1</sup> | -0.04     | 9.06 × 10 <sup>-1</sup> |
| T_ALT_S_010902       | MAP2K3              | 0.57      | 1.64 × 10 <sup>-3</sup>  | 0.05      | 9.03 × 10 <sup>-1</sup> | 0.24      | 8.44 × 10 <sup>-1</sup> | 0.34      | 2.37 × 10 <sup>-1</sup> |
| T_ALT_S_010558       | MAP2K5              | -0.27     | 1.15 × 10 <sup>-2</sup>  | 0.01      | 9.67 × 10 <sup>-1</sup> | -0.24     | 6.09 × 10 <sup>-1</sup> | -0.12     | 6.12 × 10 <sup>-1</sup> |
| T_ALT_S_011089       | MAPK1               | -0.20     | 1.77 × 10 <sup>-2</sup>  | 0.06      | 6.87 × 10 <sup>-1</sup> | -0.15     | 7.67 × 10 <sup>-1</sup> | -0.25     | 2.44 × 10 <sup>-2</sup> |
| T_ALT_S_015036       | MAPK14 <sup>1</sup> | -0.23     | 4.07 × 10 <sup>-2</sup>  | -0.17     | 2.21 × 10 <sup>-1</sup> | -0.03     | 9.90 × 10 <sup>-1</sup> | -0.26     | 6.29 × 10 <sup>-2</sup> |
| T_ALT_S_015037       | MAPK14 <sup>1</sup> | 0.94      | 5.73 × 10 <sup>-13</sup> | -0.07     | 7.93 × 10 <sup>-1</sup> | 0.45      | 3.05 × 10 <sup>-1</sup> | 0.70      | 3.96 × 10 <sup>-4</sup> |
| T_ALT_S_009331       | MAPK8               | -0.37     | 1.59 × 10 <sup>-3</sup>  | -0.30     | 2.56 × 10 <sup>-2</sup> | -0.11     | 9.41 × 10 <sup>-1</sup> | -0.18     | 3.14 × 10 <sup>-1</sup> |
| T_ALT_S_010038       | PIK3CA              | -0.54     | 1.84 × 10 <sup>-3</sup>  | -0.29     | 2.81 × 10 <sup>-1</sup> | -0.27     | 6.42 × 10 <sup>-1</sup> | -0.30     | 1.50 × 10 <sup>-1</sup> |
| T_ALT_S_014476       | PIK3CD              | -0.33     | 4.13 × 10 <sup>-2</sup>  | 0.20      | 3.18 × 10 <sup>-1</sup> | 0.36      | 6.12 × 10 <sup>-1</sup> | 0.20      | 5.08 × 10 <sup>-1</sup> |
| T_ALT_S_006672       | PIK3R1 <sup>1</sup> | -0.05     | 8.48 × 10 <sup>-1</sup>  | -0.53     | 1.79 × 10 <sup>-2</sup> | -0.26     | 6.21 × 10 <sup>-1</sup> | -0.67     | 6.42 × 10 <sup>-3</sup> |
| T_ALT_S_006673       | PIK3R1 <sup>1</sup> | -0.09     | 7.56 × 10 <sup>-1</sup>  | -0.67     | 2.14 × 10 <sup>-2</sup> | -0.06     | 9.89 × 10 <sup>-1</sup> | -0.31     | 3.35 × 10 <sup>-1</sup> |
| T_ALT_S_011518       | PRKCD               | 0.12      | 5.36 × 10 <sup>-1</sup>  | -0.46     | 4.06 × 10 <sup>-2</sup> | -0.05     | 9.92 × 10 <sup>-1</sup> | -0.40     | 1.16 × 10 <sup>-1</sup> |
| T_ALT_S_002624       | PRKCX10             | -0.71     | 8.70 × 10 <sup>-3</sup>  | 0.31      | 4.30 × 10 <sup>-1</sup> | 0.15      | 9.63 × 10 <sup>-1</sup> | -0.44     | 2.47 × 10 <sup>-1</sup> |
| T_ALT_S_004522       | PRKCH <sup>1</sup>  | 0.50      | 1.42 × 10 <sup>-1</sup>  | 0.41      | 2.16 × 10 <sup>-1</sup> | -0.28     | 8.22 × 10 <sup>-1</sup> | 1.27      | 3.87 × 10 <sup>-5</sup> |
| T_ALT_S_004523       | PRKCH <sup>1</sup>  | 0.27      | NA                       | 0.38      | 3.25 × 10 <sup>-1</sup> | 0.02      | NA                      | 1.39      | 4.58 × 10 <sup>-5</sup> |
| T_ALT_S_010069       | PRKCI               | -0.27     | 1.01 × 10 <sup>-2</sup>  | 0.07      | 7.63 × 10 <sup>-1</sup> | -0.01     | 9.97 × 10 <sup>-1</sup> | -0.02     | 9.47 × 10 <sup>-1</sup> |
| T_ALT_S_004239       | PRKD1               | -0.21     | 2.82 × 10 <sup>-1</sup>  | 0.20      | 2.85 × 10 <sup>-1</sup> | -0.11     | 9.69 × 10 <sup>-1</sup> | -0.41     | 4.01 × 10 <sup>-2</sup> |
| Nuclear              |                     |           |                          |           |                         |           |                         |           |                         |
| T_ALT_S_002034       | ATM                 | -0.25     | 2.01 × 10 <sup>-2</sup>  | -0.26     | 2.63 × 10 <sup>-2</sup> | -0.09     | 9.38 × 10 <sup>-1</sup> | -0.06     | 7.25 × 10 <sup>-1</sup> |
| T_ALT_S_001339       | BACH1               | -0.51     | 3.24 × 10 <sup>-3</sup>  | -0.36     | 3.18 × 10 <sup>-2</sup> | -0.30     | 4.15 × 10 <sup>-1</sup> | -0.63     | 1.12 × 10 <sup>-4</sup> |
| T_ALT_S_014852       | CDC34               | -0.33     | 9.37 × 10 <sup>-2</sup>  | -0.64     | 8.97 × 10 <sup>-4</sup> | 0.05      | 9.93 × 10 <sup>-1</sup> | 0.04      | 8.76 × 10 <sup>-1</sup> |
| T_ALT_S_010676       | CRX10BBP            | 0.45      | 2.35 × 10 <sup>-5</sup>  | 0.07      | 6.94 × 10 <sup>-1</sup> | -0.18     | 9.21 × 10 <sup>-1</sup> | 0.67      | 9.17 × 10 <sup>-3</sup> |
| T_ALT_S_009069       | DNAJB4              | -0.24     | 4.29 × 10 <sup>-2</sup>  | -0.20     | 1.46 × 10 <sup>-1</sup> | -0.06     | 9.89 × 10 <sup>-1</sup> | -0.08     | 7.75 × 10 <sup>-1</sup> |
| T_ALT_S_007316       | DNAJB6              | -0.35     | 3.03 × 10 <sup>-2</sup>  | -0.25     | 1.06 × 10 <sup>-1</sup> | -0.12     | 9.49 × 10 <sup>-1</sup> | -0.22     | 4.65 × 10 <sup>-1</sup> |
| T_ALT_S_009102       | DNAJC9              | -0.35     | 2.39 × 10 <sup>-2</sup>  | 0.01      | 9.81 × 10 <sup>-1</sup> | -0.27     | 6.24 × 10 <sup>-1</sup> | -0.47     | 5.08 × 10 <sup>-2</sup> |
| T_ALT_S_000577       | X10P300             | -0.04     | 8.35 × 10 <sup>-1</sup>  | -0.14     | 4.30 × 10 <sup>-1</sup> | 0.13      | 8.84 × 10 <sup>-1</sup> | -0.36     | 3.48 × 10 <sup>-2</sup> |
| T_ALT_S_001124       | GSK3B               | 0.15      | 2.86 × 10 <sup>-1</sup>  | 0.23      | 2.25 × 10 <sup>-1</sup> | 0.04      | 9.93 × 10 <sup>-1</sup> | 0.33      | 4.84 × 10 <sup>-2</sup> |
| T_ALT_S_008102       | NFX102L2            | 0.58      | 1.84 × 10 <sup>-7</sup>  | 0.33      | 3.70 × 10 <sup>-2</sup> | 0.52      | 1.09 × 10 <sup>-3</sup> | 0.21      | 1.44 × 10 <sup>-1</sup> |
| T_ALT_S_002690       | PRKD3               | -0.04     | 8.59 × 10 <sup>-1</sup>  | 0.06      | 8.68 × 10 <sup>-1</sup> | 0.06      | 9.84 × 10 <sup>-1</sup> | -0.41     | 4.26 × 10 <sup>-2</sup> |
| T_ALT_S_008084       | UBX102X 103         | -0.23     | 1.83 × 10 <sup>-1</sup>  | -0.10     | 6.92 × 10 <sup>-1</sup> | 0.03      | 9.93 × 10 <sup>-1</sup> | -0.59     | 1.34 × 10 <sup>-2</sup> |

Table S6. *Cont.*

| <i>Downstream Cytoplasmic</i>        |                            |       |                        |       |                       |       |                       |       |                       |
|--------------------------------------|----------------------------|-------|------------------------|-------|-----------------------|-------|-----------------------|-------|-----------------------|
| T_ALT_S_008999                       | <i>AKR1A1</i>              | 0.34  | $3.18 \times 10^{-2}$  | 0.07  | $7.76 \times 10^{-1}$ | 0.25  | $8.07 \times 10^{-1}$ | 0.69  | $5.58 \times 10^{-5}$ |
| T_ALT_S_014672                       | <i>AKR7A2</i>              | 0.47  | $1.15 \times 10^{-2}$  | 0.14  | $4.91 \times 10^{-1}$ | 0.34  | $5.55 \times 10^{-1}$ | 0.18  | $3.37 \times 10^{-1}$ |
| T_ALT_S_008024                       | <i>AOX1</i>                | 0.28  | $3.65 \times 10^{-2}$  | 0.00  | $9.96 \times 10^{-1}$ | -0.02 | $9.95 \times 10^{-1}$ | -0.04 | $8.86 \times 10^{-1}$ |
| T_ALT_S_003995                       | <i>CAT</i>                 | -0.18 | $3.15 \times 10^{-1}$  | -0.44 | $3.49 \times 10^{-4}$ | -0.18 | $8.54 \times 10^{-1}$ | -0.30 | $1.58 \times 10^{-1}$ |
| T_ALT_S_010665                       | <i>DNAJA3</i>              | 0.40  | $1.15 \times 10^{-3}$  | -0.03 | $8.79 \times 10^{-1}$ | 0.07  | $9.78 \times 10^{-1}$ | 0.21  | $1.66 \times 10^{-1}$ |
| T_ALT_S_009842                       | <i>DNAJB11</i>             | -0.32 | $7.44 \times 10^{-3}$  | -0.08 | NA                    | -0.39 | $2.36 \times 10^{-1}$ | 0.31  | $1.15 \times 10^{-1}$ |
| T_ALT_S_008078                       | <i>DNAJC10</i>             | -0.39 | $1.01 \times 10^{-3}$  | -0.02 | $9.65 \times 10^{-1}$ | -0.05 | $9.91 \times 10^{-1}$ | 0.18  | $4.09 \times 10^{-1}$ |
| T_ALT_S_014426                       | <i>DNAJC11</i>             | 0.26  | $4.81 \times 10^{-2}$  | -0.06 | $7.63 \times 10^{-1}$ | -0.20 | $8.47 \times 10^{-1}$ | 0.20  | $3.88 \times 10^{-1}$ |
| T_ALT_S_007708                       | <i>DNAJC13</i>             | 0.03  | $8.56 \times 10^{-1}$  | -0.40 | $6.56 \times 10^{-3}$ | 0.07  | $9.80 \times 10^{-1}$ | 0.08  | $7.48 \times 10^{-1}$ |
| T_ALT_S_014061                       | <i>DNAJC18</i>             | -0.02 | $8.95 \times 10^{-1}$  | -0.02 | $9.44 \times 10^{-1}$ | -0.24 | $5.93 \times 10^{-1}$ | -0.42 | $1.81 \times 10^{-2}$ |
| T_ALT_S_002734                       | <i>X10PHX1</i>             | 0.63  | $5.74 \times 10^{-4}$  | -0.06 | $8.95 \times 10^{-1}$ | 0.03  | $9.93 \times 10^{-1}$ | 0.57  | $2.36 \times 10^{-3}$ |
| T_ALT_S_003948                       | <i>FTH1</i>                | 0.10  | $6.77 \times 10^{-1}$  | 0.38  | $4.52 \times 10^{-2}$ | -0.10 | $9.41 \times 10^{-1}$ | 0.12  | $7.29 \times 10^{-1}$ |
| T_ALT_S_003347                       | <i>GSTA3</i> <sup>1</sup>  | 1.60  | $1.47 \times 10^{-10}$ | 0.74  | $1.79 \times 10^{-2}$ | 0.48  | $3.63 \times 10^{-1}$ | 0.52  | $2.34 \times 10^{-1}$ |
| T_ALT_S_003348                       | <i>GSTA3</i> <sup>1</sup>  | 1.52  | $2.87 \times 10^{-9}$  | 0.85  | $4.31 \times 10^{-3}$ | 0.39  | $5.52 \times 10^{-1}$ | 0.23  | $6.61 \times 10^{-1}$ |
| T_ALT_S_003346                       | <i>GSTA3</i> <sup>1</sup>  | 1.11  | $9.74 \times 10^{-5}$  | 0.40  | $2.66 \times 10^{-1}$ | 0.36  | $5.83 \times 10^{-1}$ | 0.80  | $4.76 \times 10^{-2}$ |
| T_ALT_S_003345                       | <i>GSTA4</i>               | 0.82  | $8.65 \times 10^{-7}$  | 0.47  | $2.82 \times 10^{-2}$ | 0.35  | $6.56 \times 10^{-1}$ | 0.42  | $4.09 \times 10^{-2}$ |
| T_ALT_S_001023                       | <i>GSTK1</i>               | 0.07  | $6.99 \times 10^{-1}$  | -0.31 | $2.39 \times 10^{-2}$ | -0.26 | $5.83 \times 10^{-1}$ | -0.11 | $6.34 \times 10^{-1}$ |
| T_ALT_S_009475                       | <i>GSTO1</i>               | 0.13  | $5.87 \times 10^{-1}$  | 0.06  | $8.65 \times 10^{-1}$ | -0.28 | $3.27 \times 10^{-1}$ | 1.07  | $4.63 \times 10^{-3}$ |
| T_ALT_S_011992                       | <i>HX10RPUD1</i>           | -0.25 | $3.76 \times 10^{-1}$  | 0.69  | $3.75 \times 10^{-4}$ | -0.20 | $9.21 \times 10^{-1}$ | -0.26 | $3.11 \times 10^{-1}$ |
| T_ALT_S_000662                       | <i>HMOX1</i>               | 0.29  | $1.91 \times 10^{-1}$  | -0.14 | $7.31 \times 10^{-1}$ | 0.32  | $3.84 \times 10^{-1}$ | 0.85  | $1.48 \times 10^{-9}$ |
| T_ALT_S_005601                       | <i>MGST2</i>               | 0.84  | $6.76 \times 10^{-7}$  | 0.14  | $6.23 \times 10^{-1}$ | 0.41  | $2.18 \times 10^{-1}$ | 0.37  | $8.19 \times 10^{-2}$ |
| T_ALT_S_008700                       | <i>MGST3</i>               | 0.56  | $9.79 \times 10^{-5}$  | 0.10  | $7.83 \times 10^{-1}$ | 0.33  | $2.55 \times 10^{-1}$ | 0.73  | $4.64 \times 10^{-4}$ |
| T_ALT_S_012166                       | <i>NQO1</i>                | 0.63  | $2.64 \times 10^{-6}$  | 0.03  | $8.87 \times 10^{-1}$ | 0.57  | $1.81 \times 10^{-3}$ | 0.02  | $9.39 \times 10^{-1}$ |
| T_ALT_S_004785                       | <i>NQO2</i>                | 0.24  | $2.42 \times 10^{-1}$  | 0.63  | $1.94 \times 10^{-4}$ | 0.00  | 1.00                  | 0.73  | $6.78 \times 10^{-6}$ |
| T_ALT_S_009000                       | <i>PRDX1</i>               | 0.49  | $2.13 \times 10^{-3}$  | 0.10  | $6.39 \times 10^{-1}$ | 0.10  | $9.69 \times 10^{-1}$ | 0.66  | $1.03 \times 10^{-4}$ |
| T_ALT_S_016734                       | <i>STIP1</i>               | -0.03 | $8.93 \times 10^{-1}$  | -0.19 | $2.64 \times 10^{-1}$ | -0.14 | $8.98 \times 10^{-1}$ | 0.36  | $9.48 \times 10^{-3}$ |
| T_ALT_S_007072                       | <i>TXN</i>                 | 0.09  | $5.73 \times 10^{-1}$  | -0.62 | $2.26 \times 10^{-3}$ | -0.05 | $9.80 \times 10^{-1}$ | -0.07 | $6.80 \times 10^{-1}$ |
| T_ALT_S_000674                       | <i>TXNRD1</i> <sup>1</sup> | 0.61  | $1.32 \times 10^{-2}$  | 0.15  | $7.63 \times 10^{-1}$ | 0.54  | $2.55 \times 10^{-1}$ | 0.45  | $2.82 \times 10^{-1}$ |
| T_ALT_S_011677                       | <i>TXNRD1</i> <sup>1</sup> | -0.30 | $2.07 \times 10^{-3}$  | 0.00  | $9.99 \times 10^{-1}$ | 0.00  | $9.99 \times 10^{-1}$ | -0.16 | $3.06 \times 10^{-1}$ |
| T_ALT_S_007907                       | <i>UGT1A1</i>              | 0.62  | $2.35 \times 10^{-5}$  | 0.06  | $8.19 \times 10^{-1}$ | 0.15  | $9.05 \times 10^{-1}$ | 0.34  | $8.16 \times 10^{-3}$ |
| <i>Extracellular/Plasma Membrane</i> |                            |       |                        |       |                       |       |                       |       |                       |
| T_ALT_S_009396                       | <i>MRP2</i>                | 0.16  | $3.07 \times 10^{-1}$  | -0.32 | $3.68 \times 10^{-2}$ | 0.24  | $4.82 \times 10^{-1}$ | 0.24  | $2.59 \times 10^{-1}$ |
| T_ALT_S_006174                       | <i>SOD3</i>                | 0.33  | $3.12 \times 10^{-1}$  | 0.17  | $7.08 \times 10^{-1}$ | 0.07  | $9.92 \times 10^{-1}$ | 0.58  | $2.25 \times 10^{-2}$ |

Genes were identified using Ingenuity Pathway Analysis (IPA). Log<sub>2</sub> fold change (Log<sub>2</sub>FC) and FD-adjusted *p*-values (*q*-values) were determined in DESeq2 [30]. Differential expression (DE), domesticated turkey (DT), wild turkey (WT), control (CNTL), control 1 day (C1), control 5 days (C5), aflatoxin B<sub>1</sub> (AFB), aflatoxin B<sub>1</sub> 1 day (A1), aflatoxin B<sub>1</sub> 5 days (A5), no statistics due to low read counts (NA). <sup>1</sup> Multiple genes in the MAKER gene set had significant DE and annotated to the same reference.
